# Supplementary material for: Bioinformatics Prediction and Evolution Analysis of Arabinogalactan Proteins in the Plant Kingdom
Source: Front Plant Sci. 2017 Jan 26;8:66. doi: 10.3389/fpls.2017.00066 (PMC5266747; doi:10.3389/fpls.2017.00066)
Supplement: Supplementary file 5 [file Table5.XLS]

## Sheet: Sheet1
Supplementary Table S5. Detailed Information of 310 already-known AGPs with at least three glycomodules
Gene	Locus or accession number	Species	Subfamily	Signal peptide (D value)	LengthT	PASTT%	GlycoNoT	LengthP	PASTP%	GlycoNoP	GlycoIndex
AtAGP1	At5g64310	Arabidopsis thaliana	C	0.935	131	59.54	21	82	73.17	21	0.256098
AtAGP10	At4g09030	Arabidopsis thaliana	C	0.901	127	65.35	23	80	81.25	23	0.2875
AtAGP11	At3g01700	Arabidopsis thaliana	C	0.937	136	61.76	18	88	75	18	0.204545
AtAGP12	At3g13520	Arabidopsis thaliana	Pep	0.631	60	43.33	4	16	75	4	0.25
AtAGP13	At4g26320	Arabidopsis thaliana	Pep	0.653	59	47.46	4	16	81.25	4	0.25
AtAGP14	At5g56540	Arabidopsis thaliana	Pep	0.585	60	41.67	4	16	81.25	4	0.25
AtAGP15	At5g11740	Arabidopsis thaliana	Pep	0.729	60	51.67	3	6	100	3	0.5
AtAGP16	At2g46330	Arabidopsis thaliana	Pep	0.778	73	41.1	3	6	100	3	0.5
AtAGP17	At2g23130	Arabidopsis thaliana	KC	0.844	185	56.76	31	117	73.5	31	0.264957
AtAGP18	At4g37450	Arabidopsis thaliana	KC	0.851	209	61.24	34	140	76.43	34	0.242857
AtAGP19	At1g68725	Arabidopsis thaliana	KC	0.744	247	68.42	47	175	86.29	47	0.268571
AtAGP2	At2g22470	Arabidopsis thaliana	C	0.898	131	63.36	20	84	77.38	20	0.238095
AtAGP20	At3g61640	Arabidopsis thaliana	Pep	0.715	74	43.24	4	15	73.33	4	0.266667
AtAGP21	At1g55330	Arabidopsis thaliana	Pep	0.69	58	46.55	4	16	75	4	0.25
AtAGP22	At5g53250	Arabidopsis thaliana	Pep	0.517	63	38.1	3	6	100	3	0.5
AtAGP23	At3g57690	Arabidopsis thaliana	Pep	0.546	61	45.9	4	16	87.5	4	0.25
AtAGP24	At5g40730	Arabidopsis thaliana	Pep	0.78	69	40.58	4	9	88.89	4	0.444444
AtAGP25	At5g18690	Arabidopsis thaliana	C	0.853	116	50	14	59	64.41	14	0.237288
AtAGP26	At2g47930	Arabidopsis thaliana	C	0.676	135	54.07	15	77	64.94	15	0.194805
AtAGP27	At3g06360	Arabidopsis thaliana	C	0.877	125	53.6	12	63	69.84	12	0.190476
AtAGP28	At1g03820	Arabidopsis thaliana	NC	0.759	222	24.77	5	6	100	3	0.5
AtAGP29	At1g36150	Arabidopsis thaliana	NC	0.897	256	54.3	29	119	78.15	26	0.218487
AtAGP3	At4g40090	Arabidopsis thaliana	C	0.904	139	61.87	24	86	76.74	24	0.27907
AtAGP30	At2g33790	Arabidopsis thaliana	NC	0.871	239	34.31	13	38	60.53	10	0.263158
AtAGP31	At1g28290	Arabidopsis thaliana	NC	0.844	359	43.45	32	162	64.2	30	0.185185
AtAGP32	At5g21160	Arabidopsis thaliana	NC	0.107	833	29.65	29	60	63.33	13	0.216667
AtAGP33	At5g56330	Arabidopsis thaliana	NC	0.884	350	39.43	32	108	79.63	28	0.259259
AtAGP4	At5g10430	Arabidopsis thaliana	C	0.918	135	72.59	28	88	88.64	28	0.318182
AtAGP40	At3g20865	Arabidopsis thaliana	Pep	0.828	62	48.39	3	6	100	3	0.5
AtAGP41	At5g24105	Arabidopsis thaliana	Pep	0.711	63	38.1	3	6	100	3	0.5
AtAGP42	At1g51915	Arabidopsis thaliana	Pep	0.842	67	35.82	4	10	60	3	0.3
AtAGP43	At2g41905	Arabidopsis thaliana	Pep	0.503	61	44.26	4	17	76.47	4	0.235294
AtAGP44	At3g01730	Arabidopsis thaliana	Pep	0.916	87	45.98	4	12	91.67	4	0.333333
AtAGP45	At5g12880	Arabidopsis thaliana	Pep	0.573	73	43.84	6	16	68.75	5	0.3125
AtAGP5	At1g35230	Arabidopsis thaliana	C	0.891	133	63.91	23	86	77.91	23	0.267442
AtAGP50	At1g24520	Arabidopsis thaliana	C	0.918	119	46.22	8	23	73.91	5	0.217391
AtAGP51	At1g31250	Arabidopsis thaliana	C	0.652	165	54.55	22	104	66.35	21	0.201923
AtAGP52	At1g63530	Arabidopsis thaliana	C	0.098	499	50.3	29	52	63.46	7	0.134615
AtAGP53	At1g63540	Arabidopsis thaliana	C	0.1	635	51.02	51	185	64.86	38	0.205405
AtAGP54	At2g28440	Arabidopsis thaliana	C	0.866	268	50	37	150	72.67	37	0.246667
AtAGP55	At2g45000	Arabidopsis thaliana	C	0.115	739	57.24	50	211	75.83	34	0.161137
AtAGP56	At3g22070	Arabidopsis thaliana	C	0.229	178	57.3	18	105	79.05	18	0.171429
AtAGP57	At3g45230	Arabidopsis thaliana	C	0.847	175	42.29	19	78	67.95	18	0.230769
AtAGP58	At4g16980	Arabidopsis thaliana	C	0.895	164	54.88	17	82	69.51	15	0.182927
AtAGP6	At5g14380	Arabidopsis thaliana	C	0.905	150	64.67	20	88	81.82	20	0.227273
AtAGP7	At5g65390	Arabidopsis thaliana	C	0.855	130	66.92	23	81	85.19	23	0.283951
AtAGP9	At2g14890	Arabidopsis thaliana	C	0.897	191	71.73	38	143	87.41	38	0.265734
AtENODL1	At5g53870	Arabidopsis thaliana	PAG	0.873	370	54.59	53	209	76.56	53	0.253589
AtENODL10	At5g57920	Arabidopsis thaliana	PAG	0.891	182	22.53	6	31	45.16	5	0.16129
AtENODL11	At2g23990	Arabidopsis thaliana	PAG	0.47	226	36.73	15	49	81.63	13	0.265306
AtENODL12	At4g30590	Arabidopsis thaliana	PAG	0.867	190	31.58	9	21	76.19	7	0.333333
AtENODL13	At5g25090	Arabidopsis thaliana	PAG	0.925	186	32.26	9	18	77.78	6	0.333333
AtENODL14	At2g25060	Arabidopsis thaliana	PAG	0.879	182	31.87	8	26	57.69	7	0.269231
AtENODL15	At4g31840	Arabidopsis thaliana	PAG	0.899	177	31.64	7	23	60.87	5	0.217391
AtENODL18	At1g08500	Arabidopsis thaliana	PAG	0.867	228	32.89	9	29	55.17	5	0.172414
AtENODL19	At4g12880	Arabidopsis thaliana	PAG	0.829	141	23.4	4	14	92.86	3	0.214286
AtENODL2	At4g27520	Arabidopsis thaliana	PAG	0.837	349	52.15	38	187	74.33	38	0.203209
AtENODL20	At2g27035	Arabidopsis thaliana	PAG	0.797	163	23.93	3	13	84.62	3	0.230769
AtENODL3	At4g28365	Arabidopsis thaliana	PAG	0.377	199	31.16	11	44	63.64	10	0.227273
AtENODL4	At4g32490	Arabidopsis thaliana	PAG	0.411	221	33.94	16	68	61.76	15	0.220588
AtENODL6	At1g48940	Arabidopsis thaliana	PAG	0.875	177	24.86	4	13	84.62	4	0.307692
AtENODL7	At1g79800	Arabidopsis thaliana	PAG	0.858	192	31.77	4	12	75	3	0.25
AtENODL9	At3g20570	Arabidopsis thaliana	PAG	0.873	203	38.92	12	38	76.32	10	0.263158
AtFLA1	At5g55730	Arabidopsis thaliana	FLA	0.885	424	33.73	16	44	68.18	12	0.272727
AtFLA10	At3g60900	Arabidopsis thaliana	FLA	0.821	422	41.23	26	74	71.62	20	0.27027
AtFLA11	At5g03170	Arabidopsis thaliana	FLA	0.862	246	36.99	9	16	87.5	7	0.4375
AtFLA12	At5g60490	Arabidopsis thaliana	FLA	0.914	249	35.74	11	26	76.92	8	0.307692
AtFLA13	At5g44130	Arabidopsis thaliana	FLA	0.848	247	30.77	11	19	78.95	6	0.315789
AtFLA14	At3g12660	Arabidopsis thaliana	FLA	0.727	255	35.69	11	43	62.79	9	0.209302
AtFLA15	At3g52370	Arabidopsis thaliana	FLA	0.856	436	28.21	16	29	65.52	8	0.275862
AtFLA16	At2g35860	Arabidopsis thaliana	FLA	0.847	445	28.54	17	41	68.29	11	0.268293
AtFLA17	At5g06390	Arabidopsis thaliana	FLA	0.828	458	26.2	16	31	74.19	10	0.322581
AtFLA18	At3g11700	Arabidopsis thaliana	FLA	0.784	462	25.76	12	26	69.23	7	0.269231
AtFLA19	At1g15190	Arabidopsis thaliana	FLA	0.835	248	33.87	13	37	51.35	7	0.189189
AtFLA2	At4g12730	Arabidopsis thaliana	FLA	0.839	403	31.27	9	11	81.82	3	0.272727
AtFLA20	At5g40940	Arabidopsis thaliana	FLA	0.114	424	29.95	14	47	59.57	7	0.148936
AtFLA21	At5g06920	Arabidopsis thaliana	FLA	0.688	353	32.01	10	18	72.22	3	0.166667
AtFLA3	At2g24450	Arabidopsis thaliana	FLA	0.913	280	38.57	18	68	69.12	15	0.220588
AtFLA4	At3g46550	Arabidopsis thaliana	FLA	0.885	420	37.62	17	69	60.87	12	0.173913
AtFLA5	At4g31370	Arabidopsis thaliana	FLA	0.906	278	37.05	14	49	69.39	11	0.22449
AtFLA6	At2g20520	Arabidopsis thaliana	FLA	0.911	247	34.82	9	32	81.25	8	0.25
AtFLA7	At2g04780	Arabidopsis thaliana	FLA	0.819	254	39.37	13	43	79.07	12	0.27907
AtFLA8	At2g45470	Arabidopsis thaliana	FLA	0.826	420	43.1	26	69	73.91	20	0.289855
AtFLA9	At1g03870	Arabidopsis thaliana	FLA	0.888	247	31.58	12	16	87.5	7	0.4375
AtSC1	At2g26720	Arabidopsis thaliana	PAG	0.891	206	30.1	6	24	54.17	5	0.208333
AtSC2	At2g31050	Arabidopsis thaliana	PAG	0.848	200	32	10	49	59.18	9	0.183673
AtSC3	At5g20230	Arabidopsis thaliana	PAG	0.896	196	39.8	8	39	76.92	8	0.205128
AtSC4	At5g26330	Arabidopsis thaliana	PAG	0.879	187	40.64	8	41	80.49	8	0.195122
attAGP	Solyc08g078020	Solanum lycopersicum	NC	0.927	152	60.53	22	105	71.43	22	0.209524
AtUC1	At2g32300	Arabidopsis thaliana	PAG	0.826	261	46.74	18	48	75	11	0.229167
AtUC2	At2g44790	Arabidopsis thaliana	PAG	0.68	202	42.08	15	40	85	14	0.35
AtUC3	At3g60280	Arabidopsis thaliana	PAG	0.945	222	50.45	26	76	88.16	24	0.315789
AtUC4	At1g22480	Arabidopsis thaliana	PAG	0.871	174	41.38	4	15	46.67	3	0.2
AtUC5	At1g72230	Arabidopsis thaliana	PAG	0.847	181	38.67	6	18	50	3	0.166667
AtUC7	At3g60270	Arabidopsis thaliana	PAG	0.955	187	38.5	15	25	100	11	0.44
AtUC8	At5g07475	Arabidopsis thaliana	PAG	0.424	192	28.65	6	27	55.56	5	0.185185
AtXYLP10	At3g43720	Arabidopsis thaliana	XYLP	0.885	193	36.79	14	70	57.14	12	0.171429
AtXYLP11	At2g48130	Arabidopsis thaliana	XYLP	0.864	183	44.81	12	59	64.41	9	0.152542
AtXYLP13	At2g27130	Arabidopsis thaliana	XYLP	0.934	176	35.23	10	33	66.67	8	0.242424
AtXYLP3	At4g08670	Arabidopsis thaliana	XYLP	0.822	208	48.08	19	80	71.25	17	0.2125
AtXYLP4	At5g09370	Arabidopsis thaliana	XYLP	0.879	158	42.41	11	35	65.71	8	0.228571
AtXYLP5	At1g36150	Arabidopsis thaliana	XYLP	0.897	256	54.3	29	119	78.15	26	0.218487
AtXYLP7	At2g44300	Arabidopsis thaliana	XYLP	0.803	204	30.39	9	17	76.47	4	0.235294
AtXYLP9	At2g44290	Arabidopsis thaliana	XYLP	0.775	205	33.17	8	16	81.25	3	0.1875
AtXYP1	At5g64080	Arabidopsis thaliana	XYLP	0.846	182	47.25	11	44	59.09	8	0.181818
AtXYP2	At2g13820	Arabidopsis thaliana	XYLP	0.765	169	44.38	9	42	71.43	9	0.214286
BAN102	Brara.I03986	Brassica rapa	Pep	0.467	61	45.9	4	16	87.5	4	0.25
BcMF8	ABP57237	Brassica campestris	C	0.914	136	58.82	17	84	73.81	17	0.202381
BdHRA1	Bradi5g14346	Brachypodium distachyon	NC	0.918	197	52.79	36	131	67.18	36	0.274809
CsAGP1	Cucsa.102870	Cucumis sativus	KC	0.871	243	67.9	47	190	78.95	47	0.247368
DcAGP1	CAC16734	Daucus carota	NC	0.822	242	40.91	23	42	85.71	16	0.380952
EniFLA1	ADE62307	Eucalyptus nitens	FLA	0.936	265	38.87	16	54	75.93	14	0.259259
EniFLA2	ADE62308	Eucalyptus nitens	FLA	0.91	260	34.62	14	47	78.72	12	0.255319
EniFLA3	ADE62309	Eucalyptus nitens	FLA	0.79	248	39.92	16	47	72.34	13	0.276596
GhAGP1	AAO92753	Gossypium hirsutum	FLA	0.832	243	37.86	12	23	86.96	8	0.347826
GhAGP2	ABR68797	Gossypium hirsutum	FLA	0.871	243	37.86	12	23	86.96	8	0.347826
GhAGP3	ABR68798	Gossypium hirsutum	FLA	0.71	264	37.12	14	34	82.35	11	0.323529
GhAGP31	HQ148881	Gossypium hirsutum	NC	0.473	290	45.86	28	123	65.04	26	0.211382
GhAGP4	EF470295	Gossypium hirsutum	FLA	0.714	239	34.31	6	8	87.5	3	0.375
GhFLA1	EF672627	Gossypium hirsutum	FLA	0.871	243	37.86	12	23	86.96	8	0.347826
GhFLA10	EF672636	Gossypium hirsutum	FLA	0.82	414	32.85	18	48	75	15	0.3125
GhFLA11	EF672637	Gossypium hirsutum	FLA	0.843	417	32.37	17	46	71.74	14	0.304348
GhFLA12	EF672638	Gossypium hirsutum	FLA	0.879	415	40.96	28	69	73.91	21	0.304348
GhFLA13	EF672639	Gossypium hirsutum	FLA	0.812	425	40.47	28	75	72	22	0.293333
GhFLA14	EF672640	Gossypium hirsutum	FLA	0.795	459	27.45	14	29	62.07	7	0.241379
GhFLA15	EF672641	Gossypium hirsutum	FLA	0.865	460	27.61	12	30	63.33	7	0.233333
GhFLA16	EF672642	Gossypium hirsutum	FLA	0.907	457	27.35	13	30	63.33	7	0.233333
GhFLA17	EF672643	Gossypium hirsutum	FLA	0.894	285	38.6	16	61	60.66	12	0.196721
GhFLA19	EF672645	Gossypium hirsutum	FLA	0.926	398	30.65	11	22	72.73	6	0.272727
GhFLA2	EF672628	Gossypium hirsutum	FLA	0.827	265	40.75	16	37	86.49	14	0.378378
GhFLA3	EF672629	Gossypium hirsutum	FLA	0.871	263	39.16	17	53	79.25	16	0.301887
GhFLA4	EF672630	Gossypium hirsutum	FLA	0.918	244	34.02	10	14	100	6	0.428571
GhFLA5	EF672631	Gossypium hirsutum	FLA	0.775	239	34.73	8	8	87.5	3	0.375
GhFLA6	EF672632	Gossypium hirsutum	FLA	0.927	241	31.95	9	20	55	4	0.2
GhFLA7	EF672633	Gossypium hirsutum	FLA	0.758	262	37.4	14	34	82.35	11	0.323529
GhFLA8	EF672634	Gossypium hirsutum	FLA	0.851	424	35.14	15	17	70.59	5	0.294118
GhFLA9	EF672635	Gossypium hirsutum	FLA	0.537	436	36.24	15	27	70.37	7	0.259259
GhH6L	ACU55134	Gossypium hirsutum	C	0.903	214	72.43	51	159	89.94	51	0.320755
GhPLA1	ABI96983	Gossypium hirsutum	PAG	0.892	175	27.43	7	16	62.5	5	0.3125
HAE1	At1g62760	Arabidopsis thaliana	HAE	0.737	312	51.92	29	105	88.57	28	0.266667
HAE2	At3g50580	Arabidopsis thaliana	HAE	0.819	250	45.2	27	99	78.79	25	0.252525
HAE3	At4g11430	Arabidopsis thaliana	HAE	0.104	219	57.53	17	51	86.27	10	0.196078
HAE4	At4g22470	Arabidopsis thaliana	HAE	0.847	375	50.4	32	119	81.51	27	0.226891
HvHRA1	TC147437	Hordeum vulgare	NC	0.864	300	47.67	44	184	57.07	43	0.233696
LeAGP1	Solyc02g092790	Solanum lycopersicum	KC	0.873	215	60.93	41	149	79.19	41	0.275168
MdAGP1	MDP0000675805	Malus domestica	Pep	0.885	75	49.33	5	27	81.48	5	0.185185
MdAGP2	MDP0000902262	Malus domestica	Pep	0.886	75	50.67	5	25	88	5	0.2
Na120KD	AAC15893	Nicotiana alata	HAE	0.755	461	48.59	45	240	67.5	41	0.170833
NaAGP1	AAA66362	Nicotiana alata	C	0.9	132	64.39	21	85	77.65	21	0.247059
NaAGP2	AAB35284	Nicotiana alata	NC	0.69	461	25.16	22	42	92.86	18	0.428571
NaAGP4	AF298594	Nicotiana alata	KC	0.846	228	63.6	44	161	80.75	44	0.273292
NtEPc	BAA75495	Nicotiana tabacum	PAG	0.862	166	28.31	3	22	81.82	3	0.136364
OsAGP1	LOC_Os08g37630	Oryza sativa	C	0.83	146	71.92	25	104	80.77	25	0.240385
OsAGP10	LOC_Os08g38250	Oryza sativa	C	0.893	199	61.81	19	94	67.02	16	0.170213
OsAGP11	LOC_Os04g41480	Oryza sativa	C	0.836	235	54.47	36	165	59.39	36	0.218182
OsAGP12	LOC_Os01g02010	Oryza sativa	KC	0.923	240	63.33	41	163	80.37	41	0.251534
OsAGP13	LOC_Os07g40130	Oryza sativa	KC	0.905	230	71.3	44	171	79.53	44	0.25731
OsAGP14	LOC_Os01g37950	Oryza sativa	Pep	0.715	70	51.43	4	17	82.35	4	0.235294
OsAGP15	LOC_Os01g40950	Oryza sativa	Pep	0.84	72	40.28	3	8	100	3	0.375
OsAGP16	LOC_Os01g46850	Oryza sativa	Pep	0.853	69	40.58	3	6	100	3	0.5
OsAGP17	LOC_Os01g55220	Oryza sativa	Pep	0.772	70	47.14	4	15	80	4	0.266667
OsAGP18	LOC_Os01g57030	Oryza sativa	Pep	0.499	68	58.82	4	7	85.71	3	0.428571
OsAGP19	LOC_Os01g57040	Oryza sativa	Pep	0.573	68	57.35	4	18	94.44	4	0.222222
OsAGP2	LOC_Os01g71170	Oryza sativa	C	0.938	158	55.06	17	87	60.92	16	0.183908
OsAGP20	LOC_Os02g16500	Oryza sativa	Pep	0.59	73	38.36	6	11	90.91	4	0.363636
OsAGP22	Os02g0718100	Oryza sativa	Pep	0.621	60	55	5	16	93.75	5	0.3125
OsAGP23	LOC_Os05g12580	Oryza sativa	Pep	0.734	67	43.28	3	6	100	3	0.5
OsAGP24	LOC_Os06g21400	Oryza sativa	Pep	0.812	65	56.92	7	21	85.71	6	0.285714
OsAGP25	LOC_Os06g21410	Oryza sativa	Pep	0.643	74	45.95	4	18	94.44	4	0.222222
OsAGP26	LOC_Os06g30920	Oryza sativa	Pep	0.579	77	46.75	5	17	94.12	4	0.235294
OsAGP27	LOC_Os07g38630	Oryza sativa	Pep	0.754	64	40.63	4	12	83.33	4	0.333333
OsAGP28	A9UGV6	Oryza sativa	Pep	0.559	61	54.1	4	17	82.35	4	0.235294
OsAGP29	LOC_Os01g42210	Oryza sativa	NC	0.755	221	51.13	15	53	66.04	10	0.188679
OsAGP3	Os03g0188500	Oryza sativa	C	0.864	124	72.58	22	78	82.05	22	0.282051
OsAGP30	LOC_Os02g10240	Oryza sativa	NC	0.667	229	59.39	25	98	87.76	23	0.234694
OsAGP31	LOC_Os03g63540	Oryza sativa	NC	0.93	219	50.68	21	102	76.47	21	0.205882
OsAGP4	LOC_Os04g37770	Oryza sativa	C	0.861	131	73.28	25	95	82.11	25	0.263158
OsAGP5	Os04g0545250	Oryza sativa	C	0.899	298	72.48	56	230	77.83	53	0.230435
OsAGP6	LOC_Os05g37110	Oryza sativa	C	0.707	135	61.48	18	54	81.48	14	0.259259
OsAGP7	LOC_Os06g17450	Oryza sativa	C	0.73	128	61.72	13	72	70.83	13	0.180556
OsAGP8	LOC_Os07g28660	Oryza sativa	C	0.246	179	65.92	11	32	65.63	7	0.21875
OsAGP9	Os04g0545250	Oryza sativa	C	0.784	139	70.5	17	83	80.72	17	0.204819
OsENODL1	LOC_Os01g54430	Oryza sativa	PAG	0.867	237	35.02	12	35	71.43	9	0.257143
OsENODL10	LOC_Os03g02400	Oryza sativa	PAG	0.829	198	39.39	10	36	61.11	6	0.166667
OSENODL14	LOC_Os04g57750	Oryza sativa	PAG	0.842	180	32.78	9	22	90.91	7	0.318182
OsENODL16	LOC_Os06g17730	Oryza sativa	PAG	0.797	222	33.33	11	22	72.73	6	0.272727
OsENODL17	LOC_Os06g36010	Oryza sativa	PAG	0.603	185	37.3	9	12	100	6	0.5
OsENODL18	LOC_Os06g46740	Oryza sativa	PAG	0.795	279	50.54	27	83	89.16	24	0.289157
OsENODL2	LOC_Os01g16610	Oryza sativa	PAG	0.778	298	45.64	25	94	77.66	22	0.234043
OsENODL20	LOC_Os08g17160	Oryza sativa	PAG	0.839	193	37.82	10	23	69.57	6	0.26087
OsENODL22	LOC_Os11g29910	Oryza sativa	PAG	0.757	212	41.04	6	14	71.43	3	0.214286
OsENODL23	LOC_Os12g05470	Oryza sativa	PAG	0.33	190	39.47	8	30	63.33	7	0.233333
OsENODL24	LOC_Os12g26880	Oryza sativa	PAG	0.693	234	42.31	8	14	71.43	4	0.285714
OsENODL3	LOC_Os01g16610	Oryza sativa	PAG	0.363	224	40.18	8	9	88.89	4	0.444444
OsENODL4	LOC_Os01g17470	Oryza sativa	PAG	0.642	251	37.45	11	39	74.36	8	0.205128
OsENODL5	LOC_Os01g57880	Oryza sativa	PAG	0.729	208	38.94	10	34	79.41	9	0.264706
OsENODL6	LOC_Os02g06670	Oryza sativa	PAG	0.653	261	54.41	32	96	93.75	30	0.3125
OsENODL7	LOC_Os02g06690	Oryza sativa	PAG	0.664	214	41.12	10	41	70.73	9	0.219512
OsENODL8	LOC_Os02g48820	Oryza sativa	PAG	0.448	183	36.07	6	6	100	3	0.5
OsENODL9	LOC_Os02g49350	Oryza sativa	PAG	0.82	218	40.83	18	52	80.77	16	0.307692
OsFLA1	LOC_Os04g48490	Oryza sativa	FLA	0.831	431	41.3	23	52	80.77	18	0.346154
OsFLA10	LOC_Os09g30010	Oryza sativa	FLA	0.948	273	47.62	21	57	80.7	17	0.298246
OsFLA11	LOC_Os09g07350	Oryza sativa	FLA	0.575	401	38.15	12	9	88.89	4	0.444444
OsFLA12	LOC_Os01g62380	Oryza sativa	FLA	0.867	427	37.94	21	47	59.57	9	0.191489
OsFLA13	LOC_Os04g39600	Oryza sativa	FLA	0.682	263	41.83	15	35	68.57	11	0.314286
OsFLA14	LOC_Os04g39590	Oryza sativa	FLA	0.939	277	38.27	10	25	68	6	0.24
OsFLA15	LOC_Os02g20560	Oryza sativa	FLA	0.708	268	39.55	9	6	100	3	0.5
OsFLA16	LOC_Os07g06680	Oryza sativa	FLA	0.913	479	34.24	22	74	63.51	15	0.202703
OsFLA17	LOC_Os03g57490	Oryza sativa	FLA	0.863	479	31.73	20	46	65.22	10	0.217391
OsFLA18	LOC_Os05g48890	Oryza sativa	FLA	0.809	251	46.22	10	46	71.74	9	0.195652
OsFLA19	LOC_Os02g20540	Oryza sativa	FLA	0.921	267	41.57	10	16	100	7	0.4375
OsFLA2	LOC_Os03g03600	Oryza sativa	FLA	0.883	401	36.66	20	57	68.42	14	0.245614
OsFLA20	LOC_Os02g26320	Oryza sativa	FLA	0.587	304	40.46	20	83	57.83	16	0.192771
OsFLA23	LOC_Os06g17460	Oryza sativa	FLA	0.808	211	42.18	13	44	79.55	12	0.272727
OsFLA24	LOC_Os03g57460	Oryza sativa	FLA	0.887	474	32.7	22	66	65.15	16	0.242424
OsFLA25	LOC_Os06g44660	Oryza sativa	FLA	0.909	269	40.15	15	58	68.97	12	0.206897
OsFLA26	LOC_Os05g38500	Oryza sativa	FLA	0.695	472	40.89	23	56	64.29	13	0.232143
OsFLA27	LOC_Os09g30486	Oryza sativa	FLA	0.794	267	41.57	18	53	77.36	17	0.320755
OsFLA3	LOC_Os08g23180	Oryza sativa	FLA	0.767	415	38.31	15	55	76.36	12	0.218182
OsFLA4	LOC_Os08g38270	Oryza sativa	FLA	0.923	271	43.91	17	43	79.07	14	0.325581
OsFLA5	LOC_Os08g39270	Oryza sativa	FLA	0.726	274	44.16	16	49	77.55	12	0.244898
OsFLA6	LOC_Os05g48900	Oryza sativa	FLA	0.828	272	44.85	13	32	87.5	10	0.3125
OsFLA7	LOC_Os01g47780	Oryza sativa	FLA	0.873	247	40.08	8	8	87.5	3	0.375
OsFLA8	LOC_Os01g06580	Oryza sativa	FLA	0.835	269	45.35	21	64	82.81	18	0.28125
OsFLA9	LOC_Os05g07060	Oryza sativa	FLA	0.372	275	42.91	11	26	84.62	8	0.307692
OsLTPL1	LOC_Os03g26820	Oryza sativa	XYLP	0.822	178	51.12	14	27	85.19	10	0.37037
OsSCL1	LOC_Os03g59280	Oryza sativa	PAG	0.882	209	45.93	10	31	83.87	7	0.225806
OsUCL1	LOC_Os01g57690	Oryza sativa	PAG	0.778	247	45.34	20	68	69.12	16	0.235294
OsUCL11	LOC_Os03g57740	Oryza sativa	PAG	0.843	172	38.95	5	14	85.71	4	0.285714
OsUCL14	LOC_Os04g46120	Oryza sativa	PAG	0.851	185	35.68	9	32	59.38	6	0.1875
OsUCL16	LOC_Os06g11490	Oryza sativa	PAG	0.901	198	48.99	13	45	86.67	13	0.288889
OsUCL20	LOC_Os07g01440	Oryza sativa	PAG	0.852	195	48.21	11	31	77.42	8	0.258065
OsUCL21	LOC_Os07g07170	Oryza sativa	PAG	0.889	168	34.52	6	12	100	4	0.333333
OsUCL22	LOC_Os07g35860	Oryza sativa	PAG	0.727	198	45.96	9	31	77.42	8	0.258065
OsUCL23	LOC_Os08g04310	Oryza sativa	PAG	0.739	174	38.51	5	10	90	3	0.3
OsUCL24	LOC_Os08g04340	Oryza sativa	PAG	0.886	190	41.58	11	39	69.23	8	0.205128
OsUCL25	LOC_Os08g04350	Oryza sativa	PAG	0.68	188	43.62	11	32	65.63	8	0.25
OsUCL26	LOC_Os08g04360	Oryza sativa	PAG	0.266	182	46.7	7	15	73.33	4	0.266667
OsUCL27	LOC_Os08g04370	Oryza sativa	PAG	0.583	190	47.37	9	15	86.67	5	0.333333
OsUCL28	XP_015649812	Oryza sativa	PAG	0.814	190	37.89	7	28	50	5	0.178571
OsUCL30	LOC_Os08g37670	Oryza sativa	PAG	0.847	181	45.86	9	24	87.5	8	0.333333
OsUCL32	LOC_Os09g36940	Oryza sativa	PAG	0.762	223	40.36	8	14	78.57	3	0.214286
OsUCL33	LOC_Os09g39940	Oryza sativa	PAG	0.847	172	41.28	5	15	93.33	5	0.333333
OsUCL4	LOC_Os02g43660	Oryza sativa	PAG	0.913	202	49.5	10	38	86.84	9	0.236842
OsUCL6	LOC_Os02g52180	Oryza sativa	PAG	0.837	246	50	23	68	82.35	22	0.323529
OsXYLP10	LOC_Os07g07860	Oryza sativa	XYLP	0.856	171	47.95	12	46	65.22	10	0.217391
OsXYLP11	LOC_Os03g57990	Oryza sativa	XYLP	0.682	189	45.5	12	25	76	6	0.24
OsXYLP12	LOC_Os07g07870	Oryza sativa	XYLP	0.661	181	44.2	11	39	66.67	7	0.179487
OsXYLP13	LOC_Os03g57970	Oryza sativa	XYLP	0.856	177	46.33	8	28	71.43	5	0.178571
OsXYLP14	LOC_Os07g07930	Oryza sativa	XYLP	0.91	170	45.88	12	47	63.83	9	0.191489
OsXYLP15	LOC_Os04g38840	Oryza sativa	XYLP	0.912	200	44.5	13	45	73.33	10	0.222222
OsXYLP16	LOC_Os07g09970	Oryza sativa	XYLP	0.651	207	35.27	7	12	83.33	3	0.25
OsXYLP18	LOC_Os03g07100	Oryza sativa	XYLP	0.701	187	39.57	9	28	50	6	0.214286
OsXYLP19	LOC_Os06g47200	Oryza sativa	XYLP	0.765	150	43.33	9	10	90	4	0.4
OsXYLP2	LOC_Os03g26800	Oryza sativa	XYLP	0.852	139	41.73	7	8	100	4	0.5
OsXYLP20	LOC_Os03g46150	Oryza sativa	XYLP	0.718	243	46.91	14	85	61.18	14	0.164706
OsXYLP3	LOC_Os07g30590	Oryza sativa	XYLP	0.878	170	43.53	13	43	67.44	10	0.232558
OsXYLP4	LOC_Os07g43290	Oryza sativa	XYLP	0.813	177	50.85	17	56	80.36	14	0.25
OsXYLP5	LOC_Os03g09230	Oryza sativa	XYLP	0.765	211	46.45	14	28	78.57	9	0.321429
OsXYLP6	LOC_Os03g20760	Oryza sativa	XYLP	0.802	199	40.2	11	8	87.5	3	0.375
OsXYLP7	LOC_Os05g41030	Oryza sativa	XYLP	0.808	210	47.62	14	42	78.57	11	0.261905
OsXYLP8	LOC_Os01g59870	Oryza sativa	XYLP	0.708	187	44.39	11	49	67.35	10	0.204082
OsXYLP9	LOC_Os07g07790	Oryza sativa	XYLP	0.761	188	51.06	14	39	74.36	10	0.25641
PhPRP1	ACN60130	Petunia hybrida	NC	0.862	256	40.23	20	78	73.08	16	0.205128
PpAGP1	Contig11049	Physcomitrella patens	C	0.738	144	52.08	22	81	64.2	21	0.259259
PpAGP2	Contig4134	Physcomitrella patens	C	0.901	124	66.13	17	79	81.01	17	0.21519
PpAGP3	Contig615	Physcomitrella patens	Pep	0.666	65	49.23	4	20	75	4	0.2
PpAGP4	Contig6896	Physcomitrella patens	Pep	0.424	65	55.38	5	20	75	5	0.25
PpAGP5	Contig6913	Physcomitrella patens	Pep	0.529	65	46.15	5	20	65	5	0.25
PpFLA1	Contig6808	Physcomitrella patens	FLA	0.868	262	43.51	15	35	65.71	8	0.228571
PpFLA2	Contig9936	Physcomitrella patens	FLA	0.812	264	42.42	15	52	76.92	14	0.269231
PtaAGP6	AAF75821	Pinus taeda	KC	0.87	236	61.86	40	159	79.25	40	0.251572
SlAGP2/7/8	Solyc07g053640	Solanum lycopersicum	NC	0.617	487	22.59	20	58	68.97	18	0.310345
SlAGP4	Solyc04g074730	Solanum lycopersicum	C	0.873	131	62.6	19	83	75.9	19	0.228916
SlAGP5	Solyc10g011730	Solanum lycopersicum	Pep	0.622	72	36.11	3	6	100	3	0.5
SlAGP6	Solyc08g008230	Solanum lycopersicum	Pep	0.77	72	36.11	4	15	60	4	0.266667
SlFLA1	Solyc06g076110	Solanum lycopersicum	FLA	0.132	173	31.79	8	25	60	6	0.24
SlFLA10	Solyc07g045440	Solanum lycopersicum	FLA	0.899	409	30.07	11	13	46.15	3	0.230769
SlFLA11	Solyc12g015690	Solanum lycopersicum	FLA	0.82	312	34.62	18	39	74.36	12	0.307692
SlFLA12	Solyc10g081720	Solanum lycopersicum	FLA	0.674	439	26.42	16	26	69.23	7	0.269231
SlFLA13	Solyc01g091530	Solanum lycopersicum	FLA	0.884	414	40.82	27	63	80.95	21	0.333333
SlFLA14	Solyc10g081720	Solanum lycopersicum	FLA	0.783	449	27.17	14	26	65.38	7	0.269231
SlFLA15	Solyc07g053540	Solanum lycopersicum	FLA	0.865	247	32.39	11	25	76	8	0.32
SlFLA16	Solyc08g006300	Solanum lycopersicum	FLA	0.847	265	36.23	12	58	67.24	12	0.206897
SlFLA17	Solyc08g006290	Solanum lycopersicum	FLA	0.135	206	39.81	16	76	63.16	16	0.210526
SlFLA18	Solyc11g069250	Solanum lycopersicum	FLA	0.906	221	35.29	12	41	65.85	10	0.243902
SlFLA19	Solyc07g053540	Solanum lycopersicum	FLA	0.865	247	32.39	11	25	76	8	0.32
SlFLA2	Solyc07g048090	Solanum lycopersicum	FLA	0.779	264	37.88	14	46	73.91	12	0.26087
SlFLA20	Solyc12g015690	Solanum lycopersicum	FLA	0.82	267	37.45	18	39	74.36	12	0.307692
SlFLA21	Solyc01g091530	Solanum lycopersicum	FLA	0.201	226	41.15	16	45	77.78	14	0.311111
SlFLA22	Solyc03g112880	Solanum lycopersicum	FLA	0.287	428	34.35	16	34	58.82	6	0.176471
SlFLA3	Solyc07g048090	Solanum lycopersicum	FLA	0.129	142	41.55	9	36	72.22	8	0.222222
SlFLA4	Solyc08g006300	Solanum lycopersicum	FLA	0.847	262	39.69	14	69	65.22	14	0.202899
SlFLA5	Solyc09g007660	Solanum lycopersicum	FLA	0.875	166	37.35	6	8	100	4	0.5
SlFLA6/7	Solyc10g005960	Solanum lycopersicum	FLA	0.819	415	35.18	19	53	69.81	14	0.264151
SlFLA8	Solyc06g075220	Solanum lycopersicum	FLA	0.888	249	39.36	14	47	74.47	11	0.234043
SlFLA9	Solyc07g065540	Solanum lycopersicum	FLA	0.816	411	35.77	19	50	76	15	0.3
SlHAE2	Solyc08g078020	Solanum lycopersicum	C	0.927	96	56.25	15	70	67.14	15	0.214286
SlPAG1	Solyc07g064240	Solanum lycopersicum	PAG	0.66	218	35.32	11	44	68.18	10	0.227273
SlPAG2	Solyc08g066740	Solanum lycopersicum	PAG	0.423	200	27	5	8	87.5	3	0.375
SlPAG3	Solyc12g013900	Solanum lycopersicum	PAG	0.859	345	46.96	36	165	70.91	34	0.206061
Sta39-3	XP_013684265	Brassica napus	C	0.912	136	58.82	17	84	73.81	17	0.202381
Sta39-4	XP_013735625	Brassica napus	C	0.914	136	58.82	17	84	73.81	17	0.202381
TaHRA1	TC252449	Triticum aestivum	NC	0.865	334	51.5	57	210	59.05	53	0.252381
TTS1	Z16403	Nicotiana tabacum	NC	0.88	232	40.95	21	60	81.67	17	0.283333
TTS2	Z16404	Nicotiana tabacum	NC	0.877	261	39.08	23	80	75	18	0.225
VfENOD5	CAB97367	Vicia faba	PAG	0.843	137	34.31	6	8	100	4	0.5
ZeFLA11	CAI99883	Zinnia elegans	FLA	0.802	252	36.51	12	18	88.89	8	0.444444
ZeXYP1	BAD24657	Zinnia elegans	XYLP	0.726	183	45.9	11	52	57.69	9	0.173077
ZmHRA1	AC230008	Zea mays	NC	0.667	151	43.05	18	104	46.15	17	0.163462
